# Supplementary figures and images for: Hepatocyte nuclear factor 1α and β control terminal differentiation and cell fate commitment in the gut epithelium
Source: Oxford University Press journal article supplement (doi:10.1242/dev.044420), 2010-04-13

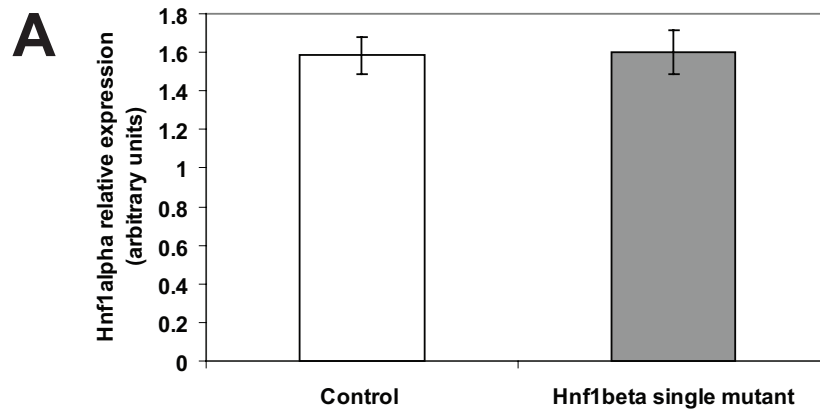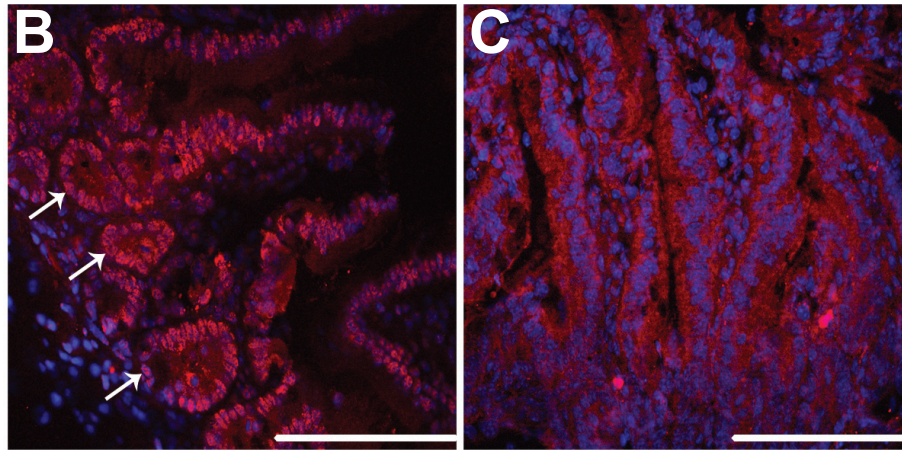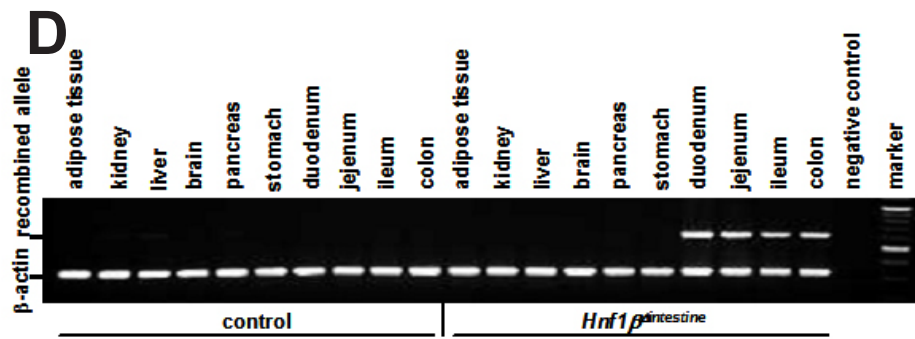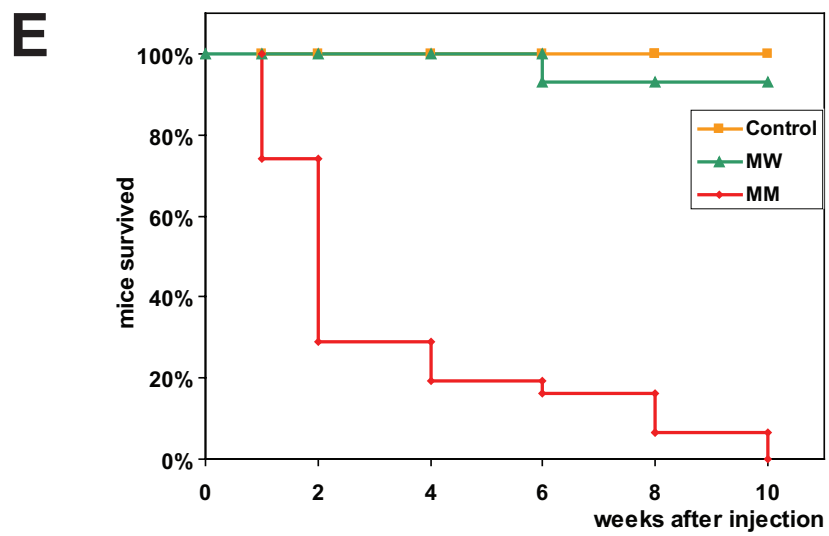

Supplement: dev044420-sup-044420figs1.pdf [file dev044420-sup-044420figs1.pdf]
